# Supplementary material for: Selenium-Rich Ag-Au Mineralization at the Kremnica Au-Ag Epithermal Deposit, Slovak Republic
Source: Preprints.org preprint supplement (doi:10.20944/preprints201810.0470.v1), 2018-10-22
Supplement: Supplementary file 3 [file supplementary]

## Sheet: TableS1
Table S1. Chemical composition of members of clausthalite (cla) - galena (gal) solid solution; base = 2 apfu
	gal	gal	gal	gal	gal	gal	gal	gal	gal	gal	gal	gal	gal	gal	gal	gal	gal	gal	gal	gal	gal	gal	gal	gal	gal	gal	gal	gal	gal	gal	gal	gal	gal	gal	gal	gal	gal	gal	gal	gal	gal	gal	gal	gal	gal	gal	gal	gal	gal
wt. %	1	2	3	4	5	6	7	8	9	10	11	12	13	14	15	16	17	18	19	20	21	22	23	24	25	26	27	28	29	30	31	32	33	34	35	36	37	38	39	40	41	42	43	44	45	46	47	48	49
Ag	0	0.22	0	0	0.15	0.04	0.16	0	0.06	0.19	0	0	0	0.08	0.09	0.15	0	0	0.1	0.06	0.18	0	0.12	0	0	0.14	0	0	0	0.04	0.04	0.048	0	0.27	0.09	0	0	0.08	0	0	0.13	0	0	0	0	0.04	0	0	0.04
Fe	0	0.31	0.79	0	0	0.4	0	0.045	0.04	0.23	0	0.24	0.061	0	0.04	0	0.65	0.089	0.38	0	0.21	0.92	0.1	0.05	0.14	0.31	0	0.33	0.234	0.51	0	0	0	0.21	0	0	0.2	0.29	0.04	0	0.07	0.53	0.31	0.28	0	0	0	0	0
Pb	86.465	86.22	85.33	86.92	85.7	86.63	87.02	86.417	85.82	84.16	87.11	84.87	86.344	85.9	84.43	85.1	86.38	86.48	86.49	85.31	85.34	86.31	86.01	85.68	84.5	85.23	86.357	85.63	86.725	87.09	85.66	87.045	86.7	85.07	86.89	87.074	86.63	87.15	85.25	85.09	84.98	83.99	85.77	86.68	86.254	87.12	85.54	87.03	86.43
Cd	0.061	0.07	0	0.05	0.07	0	0.06	0.055	0.04	0	0	0	0.054	0	0	0	0.05	0.037	0.06	0	0.09	0	0.11	0.06	0	0	0	0	0.057	0.04	0.05	0.063	0.05	0.04	0.04	0	0.08	0	0.07	0	0.06	0	0	0.07	0.07	0.05	0.05	0.07	0
Hg	0	0.09	0	0.09	0.14	0	0	0	0	0.19	0	0	0	0	0.19	0	0.27	0	0.16	0	0.12	0.07	0.21	0.14	0.06	0.11	0	0.2	0	0.19	0.09	0	0.07	0	0.24	0	0.07	0	0	0.16	0.06	0	0	0.08	0	0.14	0.08	0.22	0.2
Cu	0	0.06	0.09	0	0.08	0	0.06	0	0.06	0.16	0.19	0	0	0.07	0	0.06	0.09	0	0.06	0.08	0	0.09	0	0.09	0	0	0.23	0	0	0.06	0	0	0	0	0.23	0.282	0	0	0	0.05	0	0.05	0	0	0.05	0.19	0.06	0	0.17
Sb	0.067	0	0	0.04	0.04	0	0.06	0	0.04	0	0	0	0	0.08	0	0	0	0.062	0	0	0	0.04	0	0	0	0	0.124	0	0.042	0	0	0.072	0	0	0	0.078	0	0	0	0	0	0.05	0	0	0	0.05	0	0	0.04
Bi	0	0	0.17	0	0.16	0	0	0	0.11	0.09	0	0	0	0	0	0.1	0.08	0	0.1	0.11	0	0	0	0	0	0	0	0	0	0	0	0	0	0	0	0	0	0	0.43	0	0.13	0.14	0	0	0	0	0.52	0.67	0.45
Se	0.07	0.07	0.1	0.11	0.11	0.11	0.12	0.136	0.14	0.14	0.145	0.15	0.16	0.17	0.17	0.18	0.19	0.188	0.19	0.19	0.19	0.2	0.2	0.2	0.2	0.21	0.213	0.21	0.216	0.22	0.22	0.226	0.23	0.24	0.25	0.261	0.27	0.28	0.28	0.29	0.29	0.3	0.3	0.31	0.314	0.32	0.33	0.34	0.38
S	13.659	13.23	13.45	13.55	13.59	13.37	13.48	13.643	13.39	13.38	13.655	13.14	13.59	13.47	13.48	13.5	13.57	13.685	13.45	13.39	13.24	13.64	13.67	13.51	13.05	13.4	13.651	13.11	13.787	13.61	13.33	13.72	13.72	13.34	13.49	13.814	13.09	13.41	13.06	13.54	13.39	13.42	13.13	13.18	13.66	13.53	13.07	13.33	13.35
Cl	0.047	0.09	0.05	0.1	0.09	0	0.07	0.041	0.06	0.07	0	0.08	0.056	0.11	0.06	0.13	0.07	0	0.07	0.13	0.09	0.06	0.04	0.08	0.06	0.05	0.076	0.05	0	0.07	0.07	0.037	0.06	0	0.07	0.045	0.05	0.08	0.05	0.06	0.06	0.08	0.07	0.07	0.043	0.07	0.08	0.08	0.05
total	100.369	100.36	99.98	100.86	100.13	100.55	101.03	100.337	99.76	98.61	101.1	98.48	100.265	99.88	98.46	99.22	101.35	100.541	101.06	99.27	99.46	101.33	100.46	99.81	98.01	99.45	100.651	99.53	101.061	101.87	99.46	101.211	100.83	99.17	101.3	101.554	100.39	101.29	99.18	99.19	99.17	98.56	99.58	100.67	100.391	101.51	99.73	101.74	101.11
apfu
Ag	0	0.00484574	0	0	0.00328563	0.000878704	0.00350098	0	0.00132642	0.00420882	0	0	0	0.00176069	0.00200024	0.00330885	0	0	0.00217675	0.0013279	0.00398931	0	0.00261742	0	0	0.00308747	0	0	0	0.000860717	0.000887995	0.00104272	0	0.0059861	0.00196032	0	0	0.00174384	0	0	0.00287963	0	0	0	0	0.000869056	0	0	0.000876386
Fe	0	0.0131884	0.0332697	0	0	0.0169721	0	0.0019032	0.00170797	0.00984072	0	0.0103818	0.00258294	0	0.00171709	0	0.0270756	0.00375411	0.0159766	0	0.00898953	0.0380995	0.00421294	0.00212356	0.00610037	0.0132047	0	0.0141849	0.00978589	0.0211965	0	0	0	0.00899274	0	0	0.00856917	0.0122098	0.00173189	0	0.00299491	0.0225601	0.0132989	0.0119182	0	0	0	0	0
Pb	0.985856	0.98871	0.968623	0.989959	0.97731	0.990775	0.991318	0.985148	0.987736	0.97059	0.987948	0.98957	0.98548	0.984263	0.976923	0.977325	0.969859	0.98325	0.980163	0.982967	0.984694	0.963438	0.976709	0.980854	0.992466	0.978567	0.97838	0.992134	0.977597	0.975647	0.990039	0.984446	0.982581	0.981929	0.985322	0.976512	1.00048	0.989026	0.994916	0.977921	0.980017	0.963659	0.991794	0.994498	0.980778	0.985439	0.993411	0.991538	0.98588
Cd	0.00128205	0.00147966	0	0.00104971	0.00147147	0	0.00125993	0.00115576	0.000848623	0	0	0	0.00113609	0	0	0	0.00103483	0.000775448	0.00125339	0	0.00191423	0	0.00230256	0.00126613	0	0	0	0	0.00118439	0.000826013	0.00106524	0.00131338	0.00104453	0.000851072	0.000836125	0	0.00170307	0	0.00150589	0	0.00127547	0	0	0.00148042	0.00146721	0.00104252	0.00107037	0.00147008	0
Hg	0	0.00106601	0	0.00105877	0.00164907	0	0	0	0	0.00226331	0	0	0	0	0.00227079	0	0.00313126	0	0.00187289	0	0.00143018	0.000807087	0.00246317	0.00165544	0.000727897	0.00130452	0	0.0023935	0	0.00219856	0.00107443	0	0.00081942	0	0.00281112	0	0.000835021	0	0	0.00189935	0.000714707	0	0	0.000948058	0	0.00163568	0.000959642	0.00258894	0.0023564
Cu	0	0.00224333	0.00333101	0	0.00297456	0	0.00222857	0	0.00225156	0.00601632	0.00702587	0	0	0.00261515	0	0.00224668	0.00329472	0	0.00221699	0.00300545	0	0.00327556	0	0.00335929	0	0	0.00849608	0	0	0.00219157	0	0	0	0	0.00850388	0.0103114	0	0	0	0.0018736	0	0.00187045	0	0	0.00185371	0.00700722	0.00227191	0	0.0063225
Sb	0.00130001	0	0	0.000775278	0.000776268	0	0.00116318	0	0.000783451	0	0	0	0	0.00155994	0	0	0	0.00119961	0	0	0	0.00075984	0	0	0	0	0.00239074	0	0.000805684	0	0	0.00138574	0	0	0	0.00148862	0	0	0	0	0	0.00097626	0	0	0	0.000962458	0	0	0.00077646
Bi	0	0	0.00191323	0	0.00180899	0	0	0	0.00125519	0.00102905	0	0	0	0	0	0.00113861	0.000890531	0	0.00112356	0.0012566	0	0	0	0	0	0	0	0	0	0	0	0	0	0	0	0	0	0	0.00497536	0	0.00148636	0.00159253	0	0	0	0	0.00598725	0.00756796	0.00508904
Se	0.00209427	0.0021063	0.00297862	0.0032874	0.00329159	0.00330112	0.00358705	0.0040682	0.00422807	0.00423662	0.00431515	0.00458929	0.00479179	0.00511126	0.00516148	0.0054243	0.00559771	0.00560877	0.00564999	0.00574453	0.0057526	0.00585807	0.00595947	0.00600782	0.00616383	0.00632673	0.00633215	0.00638448	0.00638897	0.00646709	0.00667204	0.00670685	0.00683973	0.00726903	0.00743892	0.00768053	0.00818211	0.00833796	0.00857455	0.00874551	0.0087756	0.00903189	0.00910267	0.00933273	0.00936877	0.00949781	0.0100562	0.0101644	0.0113738
S	1.00634	0.980329	0.986567	0.997213	1.00143	0.988073	0.992282	1.00499	0.995827	0.997097	1.00071	0.990008	1.00227	0.997324	1.00787	1.00183	0.984524	1.00541	0.984931	0.996944	0.987161	0.983848	1.00308	0.999382	0.990423	0.994155	0.999369	0.981518	1.00424	0.985221	0.995533	1.00266	1.00474	0.994972	0.988488	1.00106	0.976856	0.983377	0.984886	1.00553	0.997812	0.994946	0.981074	0.977129	1.00368	0.988919	0.980814	0.981344	0.983993
Cl	0.00313175	0.00603142	0.00331695	0.006656	0.00599805	0	0.00466024	0.0027315	0.0040357	0.00471785	0	0.00545127	0.00373525	0.00736591	0.00405724	0.00872507	0.00459313	0	0.00463603	0.00875383	0.00606886	0.00391408	0.00265456	0.00535218	0.00411838	0.00335493	0.00503199	0.00338556	0	0.00458288	0.00472812	0.00244549	0.00397389	0	0.00463898	0.00294929	0.00337463	0.00530574	0.00341018	0.00402988	0.00404375	0.00536416	0.00473042	0.00469352	0.00285743	0.00462728	0.00542957	0.00532655	0.00333308
[truncated: 81 more columns]

## Sheet: Table S2
Table S2. Chemical composition of mineral phases along the Ag2S - Ag2Se join; base = 3 apfu
(Aca - acanthite; Agu - aguilarite; Two - phases from so-called two phases field; Nau - naumannite)
	Aca	Aca	Aca	Aca	Aca	Aca	Aca	Aca	Aca	Aca	Aca	Aca	Aca	Aca	Aca	Aca	Aca	Aca	Aca	Aca	Aca	Aca	Aca	Aca	Aca	Aca	Aca	Aca	Aca	Aca	Aca	Aca		Agu	Agu	Agu	Agu	Agu	Agu	Agu	Agu	Agu	Agu	Agu		Two	Two	Two	Two
wt. %	1	2	3	4	5	6	7	8	9	10	11	12	13	14	15	16	17	18	19	20	21	22	23	24	25	26	27	28	29	30	31	32		1	2	3	4	5	6	7	8	9	10	11		1	2	3	4
Ag	83.29	82.895	83.7	81.8	83.18	84.21	81.97	83.44	82.06	82.08	83.14	85.05	82.58	83.1	81.23	84.07	85.1	84.71	83.95	83.18	83.58	83.49	83.96	83.07	83.15	83.73	83.51	83.18	82.89	82.03	81.46	78.28		79.83	77.71	78.18	78.45	77.77	78.72	78.29	77.54	78	76.94	77.57		76.13	76.03	76.12	76.48
Fe	1.69	0.596	1.06	1.1	0.78	0.97	0.88	1.13	0.93	0.76	1.44	0.64	1.11	1.02	0.87	0.68	0.66	0.98	0.46	0.81	0.49	0.48	0.74	0.62	0.3	0.5	0.46	0.72	0.3	0.23	0.18	0		1.06	0.24	0.82	0.6	0.76	0.55	0.71	0.17	1.04	0.85	0.85		1.37	0.61	0.65	1.21
Pb	0.08	0	0	0.06	0	0	0.06	0.03	0.01	0.05	0.04	0.04	0.08	0	0.01	0.03	0.08	0.04	0.07	0.04	0.02	0.03	0.01	0.04	0.03	0.01	0.04	0.02	0	0	0	0		0	0.97	0	0	0.01	0.06	0	0.58	0.04	0.03	0.08		0.09	0.06	0	0.05
Zn	0	0	0	0	0	0.12	0	0.11	0	0	0	0.09	0.13	0.08	0.32	0	0	0	0	0	0	0	0	0	0	0	0	0	0	0.09	0.18	1.43		0	0.08	0	0	0	0	0	0	0	0	0		0.09	0	0	1.1
Hg	0.07	0	0.12	0	0	0.08	0.13	0	0.07	0.13	0.1	0	0	0	0.11	0	0	0.08	0	0.19	0.22	0	0.13	0.18	0	0	0.21	0	0.1	0.08	0	0.2		0.2	0	0	0	0	0.17	0.09	0.08	0.15	0.13	0.11		0.09	0.16	0.12	0.11
Cu	0.77	0	0.4	0.8	0	0.19	0.58	0.32	0	0	0.25	0.13	0.25	0.16	0.57	0.18	0.11	0.14	0.09	0	0.15	0.08	0	0.11	0.09	0.14	0.1	0	0.11	0.13	0.17	0.08		0.14	0	0.09	0.05	0.09	0.13	0.07	0	0.15	0.09	0.12		0	0	0.05	0
Se	2.48	2.666	2.84	2.88	2.97	3.05	3.12	3.16	3.09	3.19	3.3	3.41	3.41	3.4	3.52	3.58	3.6	3.71	4.28	4.26	4.36	4.29	4.37	4.37	4.37	4.52	4.5	4.48	4.49	4.93	5.61	8.7		14.95	14.65	15.03	14.98	15.06	15.21	15.22	15.35	15.92	16.08	16.57		18.89	18.62	19.03	19.53
Te	0.11	0	0.11	0.09	0.2	0.12	0.1	0.1	0.19	0.2	0.12	0.08	0.15	0.13	0.1	0.11	0.15	0.13	0.1	0.1	0.11	0.11	0.12	0.1	0.12	0.1	0.11	0.12	0.12	0.07	0.12	0.13		0.11	0.1	0.09	0.12	0.12	0.12	0.13	0.1	0.12	0.14	0.13		0.32	0.32	0.3	0.12
S	12.19	12.216	11.67	12.08	11.43	11.52	11.93	11.82	11.66	11.47	11.09	11.29	11.27	11	11.8	11.33	11.24	11.38	10.88	10.65	11.1	10.53	10.56	10.67	10.35	11.05	10.74	10.42	10.42	11.62	10.81	9.97		4.99	4.99	5.01	4.85	4.96	4.98	4.86	4.93	4.54	4.49	4.47		3.15	3.02	3.11	2.84
Cl	0.09	0	0.09	0.12	0.08	0.09	0.13	0.09	0.08	0.07	0.13	0.09	0.18	0.09	0.09	0.09	0.1	0.13	0.13	0.1	0.1	0.1	0.07	0.11	0.1	0.1	0.08	0.08	0.09	0.08	0.09	0.06		0.09	0.13	0.12	0.13	0.12	0.1	0.13	0.07	0.09	0.08	0.1		0.05	0.08	0.09	0.07
total	100.77	98.373	99.99	98.93	98.64	100.35	98.9	100.2	98.09	97.95	99.61	100.82	99.16	98.98	98.62	100.07	101.04	101.3	99.96	99.33	100.13	99.11	99.96	99.27	98.51	100.15	99.75	99.02	98.52	99.26	98.62	98.85		101.37	98.87	99.34	99.18	98.89	100.04	99.5	98.82	100.05	98.83	100		100.18	98.9	99.47	101.51
apfu
Ag	1.88291	1.93101	1.93158	1.88294	1.95551	1.94415	1.89699	1.91373	1.92704	1.93935	1.93749	1.96788	1.92567	1.95517	1.88419	1.95394	1.9674	1.94345	1.96824	1.96637	1.94969	1.98391	1.97904	1.9645	1.99413	1.95211	1.96777	1.9789	1.98502	1.90745	1.9273	1.85496		1.99908	2.00816	1.99194	2.01203	1.99202	2.00028	1.9993	2.00421	1.98706	1.98548	1.97875		1.97151	2.01074	1.9942	1.95658
Fe	0.0737931	0.0268161	0.0472483	0.0489066	0.0354184	0.0432543	0.0393355	0.0500584	0.0421827	0.0346836	0.0648162	0.028602	0.0499946	0.0463529	0.038978	0.0305261	0.0294713	0.0434269	0.0208309	0.0369848	0.0220776	0.0220303	0.0336904	0.02832	0.0138965	0.0225157	0.0209356	0.0330849	0.0138764	0.01033	0.00822567	0		0.05127	0.0119791	0.040354	0.0297226	0.0376	0.0269937	0.0350206	0.00848708	0.0511732	0.0423668	0.0418802		0.0685261	0.0311597	0.032891	0.0597898
Pb	0.000941565	0	0	0.000719047	0	0	0.00072291	0.000358221	0.00012226	0.000615052	0.000485302	0.000481846	0.000971227	0	0.000120762	0.000363007	0.00096289	0.000477775	0.000854438	0.0004923	0.000242894	0.000371135	0.000122717	0.000492485	0.000374572	0.00012138	0.000490704	0.000247718	0	0	0	0		0	0.0130502	0	0	0.000133354	0.000793746	0	0.00780492	0.000530519	0.00040305	0.00106246		0.00121341	0.000826124	0	0.000665951
Zn	0	0	0	0	0	0.00457152	0	0.00416306	0	0	0	0.00343622	0.00500224	0.00310591	0.0122482	0	0	0	0	0	0	0	0	0	0	0	0	0	0	0.00345332	0.00702737	0.0559157		0	0.00341135	0	0	0	0	0	0	0	0	0		0.00384591	0	0	0.0464361
Hg	0.000850977	0	0.0014892	0	0	0.000993204	0.00161784	0	0.000883976	0.00165175	0.00125318	0	0	0	0.00137209	0	0	0.00098699	0	0.00241536	0.00275974	0	0.00164781	0.0022891	0	0	0.00266096	0	0.00128779	0.00100035	0	0.00254857		0.00269326	0	0	0	0	0.00232294	0.00123594	0.00111196	0.0020549	0.00180402	0.00150894		0.00125334	0.00227548	0.00169058	0.0015133
Cu	0.0295482	0	0.0156694	0.0312591	0	0.007446	0.0227846	0.0124583	0	0	0.00988947	0.0051059	0.00989581	0.00639012	0.0224433	0.00710144	0.00431678	0.0054522	0.00358183	0	0.00593961	0.00322687	0	0.00441576	0.00366385	0.00554059	0.00399982	0	0.00447156	0.0051313	0.00682746	0.00321794		0.0059511	0	0.00389248	0.00217679	0.00391317	0.0056073	0.00303441	0	0.00648653	0.0039424	0.00519616		0	0	0.00222354	0
Se	0.0765902	0.0848404	0.0895347	0.090565	0.0953857	0.0961945	0.0986391	0.0990098	0.0991295	0.102966	0.105058	0.107786	0.108629	0.109282	0.111541	0.113668	0.113698	0.116278	0.137084	0.137575	0.138942	0.139261	0.140717	0.141181	0.143172	0.143962	0.144855	0.145602	0.146891	0.156607	0.181324	0.281636		0.511437	0.517184	0.523147	0.524855	0.526978	0.527984	0.530973	0.542014	0.554045	0.566872	0.577437		0.668282	0.672721	0.681075	0.682553
Te	0.00210218	0	0.00214596	0.00175133	0.00397478	0.00234201	0.00195637	0.00193886	0.00377185	0.00399475	0.00236402	0.00156479	0.00295692	0.00258565	0.00196087	0.00216125	0.00293154	0.0025213	0.00198199	0.00199842	0.00216919	0.00220964	0.00239114	0.00199917	0.00243284	0.0019709	0.00219114	0.00241339	0.00242932	0.001376	0.0024001	0.00260417		0.00232863	0.00218456	0.00193849	0.00260175	0.00259839	0.00257768	0.00280645	0.00218504	0.00258428	0.0030541	0.00280338		0.00700542	0.00715421	0.00664407	0.00259521
S	0.927075	0.957329	0.906011	0.935458	0.903988	0.894731	0.928805	0.912007	0.921155	0.91171	0.869431	0.878806	0.884109	0.870667	0.920798	0.885879	0.874187	0.878328	0.858148	0.846974	0.871085	0.841764	0.837375	0.848884	0.835037	0.866684	0.851363	0.833964	0.839469	0.908994	0.860412	0.794792		0.420379	0.433808	0.42943	0.418465	0.427404	0.425707	0.417526	0.428685	0.389088	0.389794	0.383601		0.274428	0.26869	0.274098	0.244423
Cl	0.0061904	0	0.00631931	0.00840433	0.0057223	0.00632189	0.0091536	0.00628041	0.00571595	0.00503218	0.00921747	0.00633587	0.0127708	0.00644268	0.00635169	0.00636431	0.007034	0.0090745	0.00927345	0.00719259	0.00709745	0.0072298	0.00502017	0.00791482	0.00729676	0.00709354	0.00573542	0.00579074	0.00655759	0.00565991	0.0064787	0.00432588		0.00685721	0.0102213	0.00930252	0.0101444	0.00935196	0.00773118	0.0101008	0.00550496	0.00697588	0.00628121	0.00776134		0.0039396	0.00643724	0.00717386	0.00544862
[truncated: 27 more columns]

## Sheet: Table S3
Table S3. Chemical composition of members of gold (gol) - silver (sil) solid solution; base = 1 apfu
	gol	gol	gol	gol	gol		sil	sil	sil	sil	sil	sil	sil	sil	sil	sil	sil	sil	sil	sil	sil	sil	sil	sil	sil	sil	sil	sil	sil	sil	sil	sil	sil	sil	sil	sil	sil	sil
wt. %	1	2	3	4	5		1	2	3	4	5	6	7	8	9	10	11	12	13	14	15	16	17	18	19	20	21	22	23	24	25	26	27	28	29	30	31	32
Ag	20.65	22.48	22.87	27.53	29.21		36.09	36.34	36.09	36.15	36.54	36.63	38.7	39.68	41.73	42.36	42.26	42.4	42.3	42.18	43.4	44.55	43.55	44.77	45.38	44.41	44.19	45.9	46.37	47.51	51.05	51.57	54.83	56.87	59.94	60.52	68.23	79.77
Fe	0.11	0.15	0.23	0.11	0.12		0	0	0	0	0	0	0.34	0.41	0.18	0.14	0.35	0.21	0.35	0	0.2	0.48	0.38	0.25	0.08	0.45	0	0.08	0.29	0.18	0.36	0.4	0.41	0.48	0.14	0.33	0.11	0.23
Au	80.45	80.8	79.21	75.21	72.67		64.59	64.84	64.14	63.92	64.63	63.99	61.88	61.35	59.64	59.99	58.8	58.33	58.15	59.2	59.98	57.98	56.79	58.23	57.64	55.49	55.84	57	55.56	52.01	49.37	49.15	47.14	43.67	39.6	38.87	30.72	18.27
Cu	0.28	0.06	0	0.06	0.08		0	0	0	0	0	0	0	0	0.16	0.05	0.06	0.37	0.09	0.09	0	0.05	0	0.14	0.31	0.05	0.17	0.21	0	0	0	0	0	0	0	0	0	0
Cl	0.05	0.05	0.09	0.02	0.04		0.07	0.06	0.06	0.05	0.04	0.08	0.05	0.07	0	0.08	0.07	0	0.06	0.04	0.06	0.08	0.06	0.06	0.08	0.07	0.06	0.09	0.07	0.09	0.07	0.05	0.07	0.07	0.11	0.11	0.06	0.13
total	101.54	103.54	102.4	102.93	102.12		100.75	101.24	100.29	100.12	101.21	100.7	100.97	101.51	101.71	102.62	101.54	101.31	100.95	101.51	103.64	103.14	100.78	103.45	103.49	100.47	100.26	103.28	102.29	99.79	100.85	101.17	102.45	101.09	99.79	99.83	99.12	98.4
apfu
Ag	0.315037	0.334159	0.341511	0.398445	0.420308		0.50352	0.504499	0.505473	0.506959	0.507106	0.509336	0.527269	0.534174	0.55632	0.558751	0.560088	0.5625	0.562823	0.563338	0.564982	0.57441	0.576308	0.577212	0.582763	0.584605	0.587308	0.589212	0.597781	0.620117	0.646239	0.649402	0.671518	0.694165	0.728915	0.731103	0.798491	0.880315
Fe	0.00324135	0.00430666	0.00663376	0.00307502	0.00333511		0	0	0	0	0	0	0.00894732	0.0106607	0.00463491	0.00356684	0.00895958	0.00538107	0.00899481	0	0.00502884	0.0119539	0.00971276	0.0062256	0.00198431	0.0114416	0	0.00198354	0.00722097	0.00453789	0.00880223	0.00972903	0.00969875	0.0113165	0.00328837	0.00769992	0.00248645	0.00490252
Au	0.67215	0.657759	0.647766	0.596125	0.572652		0.493508	0.492967	0.49197	0.490908	0.491205	0.48728	0.461711	0.452298	0.435425	0.433352	0.426779	0.423787	0.423721	0.432996	0.427613	0.409404	0.411564	0.411144	0.405369	0.400033	0.406431	0.400713	0.392253	0.371771	0.342263	0.338953	0.316175	0.291919	0.263727	0.257154	0.196886	0.110417
Cu	0.00725109	0.00151395	0	0.00147407	0.00195403		0	0	0	0	0	0	0	0	0.00362077	0.00111953	0.00134984	0.00833226	0.00203272	0.00204037	0	0.00109433	0	0.00306394	0.00675762	0.00111726	0.00383526	0.00457597	0	0	0	0	0	0	0	0	0	0
Cl	0.00232087	0.00226134	0.00408904	0.000880708	0.0017512		0.00297145	0.00253435	0.00255683	0.00213341	0.001689	0.00338452	0.00207267	0.00286714	0	0.00321064	0.0028227	0	0.00242897	0.00162541	0.00237649	0.00313837	0.00241578	0.00235364	0.00312577	0.00280362	0.00242623	0.00351513	0.00274563	0.00357414	0.00269609	0.00191569	0.00260842	0.00259966	0.00406998	0.00404308	0.00213641	0.00436497

## Sheet: Table S4
Table S4. Chemical composition of uytenbogaardtite; base = 6 apfu
wt. %	1	2	3	4
Ag	58.68	58.72	57.61	59.48
Fe	0.42	0.44	0.55	0.5
Pb	0.67	0.37	0.2	0.09
Au	24.14	25.82	25.84	25.9
Cu	1.07	0.63	0.58	0.66
Sb	1.93	0.8	1.03	1.53
Se	0.81	0.76	0.97	1.07
Te	0	0.08	0.07	0
S	10.56	10.18	9.68	9.83
Cl	0.06	0.1	0.05	0.07
total	98.34	97.9	96.58	99.13
apfu
Ag	3.10474	3.16442	3.17335	3.18937
Fe	0.0429217	0.0457987	0.058516	0.0517841
Pb	0.0184558	0.0103809	0.00573553	0.00251247
Au	0.699473	0.762014	0.779491	0.760558
Cu	0.0960999	0.0576305	0.0542315	0.0600734
Sb	0.0904723	0.0381963	0.0502667	0.0726857
Se	0.0585471	0.0559509	0.0729922	0.0783796
Te	0	0.00364451	0.00325956	0
S	1.87963	1.84557	1.79378	1.77322
Cl	0.00965885	0.0163964	0.00837971	0.0114201

## Sheet: Table S5
Table S5. Chemical composition of miargyrite; base = 4 apfu
wt. %	1	2	3	4	5	6	7	8	9	10	11	12	13	14	15	16	17	18	19	20	21	22	23	24	25	26	27	28	29	30	31	32	33	34	35	36	37	38	39	40	41	42	43	44	45	46	47	48	49
Ag	37.3	36.77	36.51	35.93	35.47	35.28	36.531	36.451	38.588	36.111	34.88	37.513	35.805	37.45	36.674	36.398	37.2	36.91	35.987	37.104	36.453	36.13	35.77	36.74	37.08	36.759	37.498	36.82	35.77	36.396	35.81	36.883	37.219	36.78	35.9	36.84	37.26	35.34	37.11	36.97	36	36.31	35.17	35.78	36.88	35.82	36.95	36.52	36.81
Fe	0.11	0.07	0.13	0.1	0.41	0	0.055	0	0.085	0	0.27	0	0	0.07	0	0	0.04	0.14	0.08	0	0	0.12	0.24	0	0	0	0	0	0.08	0	0	0	0	0	0.28	0	0.04	0	0.04	0	0	0	0	0.09	0	0.09	0	0	0
Pb	0.08	0.09	0.08	0.17	0	0.1	0.324	0.53	0.223	0.365	0	0.125	0.729	0.08	0.321	0.247	0	0	0.909	0.548	0.367	0.05	0.05	0.09	0.19	0.179	0.149	0.05	0	0.113	0.458	0	0	0.07	0.05	0.06	0.1	0.16	0.07	0.08	0.16	0	0.29	0.23	0.06	0.99	0.1	0	0
Zn	0.61	0	0	0	0	0	0	0	0	0	0	0	0	0	0	0	0.18	0	0	0	0	0	0	0	0	0	0	0	0	0	0	0	0	0	0	0	0	0	0.32	0	0	0	0	0	0	0	0	0	0
Hg	0.08	0	0	0.19	0.11	0.13	0.415	0.552	0	0.35	0.15	0	0.739	0.07	0.284	0	0.06	0.12	0.796	0.615	0.317	0.05	0	0.13	0	0	0	0	0.14	0	0.323	0	0	0	0.11	0.121	0.05	0.19	0	0.17	0.15	0.05	0.24	0.25	0.06	0.97	0.05	0	0.24
Cu	0.1	0.19	0.28	0.39	0.6	0.81	0.357	0.132	0	0.391	1.09	0.076	0.398	0.6	0.062	0.122	0.11	0.36	0.409	0.055	0	0.21	0.94	0.3	0.063	0.264	0	0.29	0.62	0.16	0.314	0.184	0.145	0.27	0.92	0.163	0.04	0.56	0.15	0.5	0.64	0.5	0.55	0.39	0.4	0.6	0	0.55	0.44
Sb	42.6	42.28	42.08	42.89	43.45	43.77	39.931	40.28	40.065	40.918	41.73	40.021	40.849	39.16	40.429	40.303	41.76	41.54	40.645	40.682	40.312	42.11	41.36	42	40.501	39.944	41.066	42.25	41.19	39.989	40.239	40.782	40.44	41.63	41.09	41.277	40.33	43.4	41.86	42.47	43.44	42.63	43.36	43.2	42.92	42.19	40.24	42.84	43.15
As	0	0	0	0	0	0	0.295	0.317	0.35	0.354	0.36	0.376	0.388	0.39	0.403	0.454	0.46	0.46	0.502	0.521	0.565	0.66	0.69	0.71	0.725	0.755	0.775	0.78	0.78	0.81	0.85	0.907	0.936	1.16	1.24	1.409	1.51	0	0.45	0.12	0.16	0	0	0	0	0	0.35	0.5	0
Se	0	0	0	0	0	0	0	0	0	0	0	0	0	0	0	0	0	0	0	0	0	0	0	0	0	0	0	0	0	0	0	0	0	0	0	0	0	0	0	0	0	0.05	0.05	0.06	0.07	0.08	0.08	0.08	0.1
S	21.78	21.26	21.22	21.42	21.43	21.27	21.152	20.955	20.911	20.851	20.8	20.262	21.223	20.84	21.112	21.096	21.38	21.16	21.691	21.787	21.377	21.32	22.06	21.08	21.253	21.069	21.857	21.54	20.74	21.508	21.025	21.549	21.88	21.15	21.96	21.724	21.2	21.29	21.49	21.05	21.07	21.33	20.98	21.42	21.39	21.23	20.47	20.57	21.37
total	102.66	100.66	100.3	101.09	101.47	101.36	99.06	99.217	100.222	99.34	99.28	98.373	100.131	98.66	99.285	98.62	101.19	100.69	101.019	101.312	99.391	100.65	101.11	101.05	99.812	98.97	101.345	101.73	99.32	98.976	99.019	100.305	100.62	101.06	101.55	101.594	100.53	100.94	101.49	101.36	101.62	100.87	100.64	101.42	101.78	101.97	98.24	101.06	102.11
apfu
Ag	0.996079	1.00564	1.00064	0.977451	0.959109	0.959271	1.01057	1.01332	1.06291	1.00266	0.963557	1.05767	0.984974	1.03993	1.01504	1.0106	1.00964	1.00773	0.976301	1.00348	1.00381	0.98478	0.955741	1.00303	1.01791	1.01645	1.00933	0.992736	0.990577	0.999354	0.992234	1.00275	1.00423	1.00095	0.956348	0.989691	1.01588	0.964584	1.00272	1.00896	0.980591	0.989505	0.96722	0.971713	0.998758	0.974966	1.03969	1.00441	0.995239
Fe	0.00567375	0.00369776	0.00688177	0.00525449	0.0214133	0	0.00293872	0	0.00452226	0	0.0144065	0	0	0.00375442	0	0	0.00209689	0.00738281	0.004192	0	0	0.0063175	0.0123858	0	0	0	0	0	0.00427909	0	0	0	0	0	0.014407	0	0.00210647	0	0.00208758	0	0	0	0	0.00472099	0	0.0047315	0	0	0
Pb	0.00111224	0.00128149	0.00114151	0.00240774	0	0.00141559	0.00466629	0.00767075	0.00319796	0.00527631	0	0.00183485	0.0104408	0.00115655	0.00462545	0.00357044	0	0	0.0128388	0.00771599	0.00526147	0.000709521	0.000695529	0.00127921	0.00271547	0.00257691	0.00208803	0.000701849	0	0.00161535	0.00660692	0	0	0.0009918	0.00069345	0.00083918	0.00141947	0.00227362	0.000984718	0.00113668	0.00226897	0	0.00415216	0.00325199	0.000845949	0.0140289	0.00146491	0	0
Zn	0.02688	0	0	0	0	0	0	0	0	0	0	0	0	0	0	0	0.00806138	0	0	0	0	0	0	0	0	0	0	0	0	0	0	0	0	0	0	0	0	0	0.0142677	0	0	0	0	0	0	0	0	0	0
Hg	0.00114884	0	0	0.00277955	0.00159949	0.00190081	0.00617354	0.00825202	0	0.00522595	0.00222831	0	0.0109322	0.00104528	0.00422694	0	0.000875704	0.00176184	0.0116127	0.00894429	0.00469418	0.000732866	0	0.00190855	0	0	0	0	0.00208488	0	0.00481278	0	0	0	0.00157579	0.00174803	0.000733086	0.00278876	0	0.00249491	0.00219715	0.000732732	0.00354934	0.00365108	0.000873784	0.0141977	0.000756557	0	0.00348944
Cu	0.00453304	0.00882075	0.0130265	0.0180097	0.0275399	0.0373854	0.0167639	0.00622897	0	0.0184287	0.051113	0.00363736	0.0185853	0.0282818	0.00291287	0.00574997	0.00506781	0.0166843	0.018835	0.00252496	0	0.00971617	0.0426338	0.0139028	0.00293571	0.0123917	0	0.0132725	0.0291451	0.00745744	0.0147688	0.00849159	0.0066411	0.012473	0.041602	0.00743314	0.00185125	0.0259457	0.00687996	0.0231631	0.0295917	0.0231295	0.0256756	0.017979	0.018388	0.0277217	0	0.0256772	0.0201938
Sb	1.0079	1.02449	1.02179	1.03375	1.04093	1.05442	0.978671	0.99209	0.97776	1.00659	1.02135	0.999722	0.995603	0.963426	0.991383	0.991431	1.00417	1.00483	0.976943	0.974795	0.983502	1.0169	0.979096	1.0159	0.985048	0.978585	0.979337	1.00925	1.01061	0.972814	0.987827	0.982334	0.966723	1.00377	0.969798	0.982453	0.974212	1.04951	1.0021	1.0269	1.04833	1.02927	1.05649	1.03945	1.0298	1.01741	1.00316	1.04389	1.03363
As	0	0	0	0	0	0	0.0117493	0.0126877	0.0138802	0.0141515	0.0143182	0.015263	0.0153673	0.015592	0.0160589	0.0181486	0.0179749	0.0180819	0.0196077	0.0202867	0.0224002	0.0259001	0.0265434	0.0279074	0.0286544	0.0300577	0.030034	0.0302782	0.0310992	0.0320211	0.033909	0.0355026	0.0363604	0.0454512	0.0475586	0.0544975	0.059274	0	0.0175061	0.00471508	0.00627467	0	0	0	0	0	0.0141789	0.0197987	0
Se	0	0	0	0	0	0	0	0	0	0	0	0	0	0	0	0	0	0	0	0	0	0	0	0	0	0	0	0	0	0	0	0	0	0	0	0	0	0	0	0	0	0.00186143	0.00187849	0.00222605	0.00258972	0.00297467	0.00307513	0.00300577	0.00369358
S	1.95667	1.95608	1.95652	1.96034	1.94941	1.94561	1.96847	1.95975	1.93773	1.94767	1.93303	1.92187	1.9641	1.94681	1.96575	1.9705	1.95212	1.94353	1.97967	1.98226	1.98034	1.95494	1.9829	1.93607	1.96274	1.95994	1.97921	1.95376	1.9322	1.98674	1.95984	1.97092	1.98605	1.93637	1.96802	1.96334	1.94452	1.9549	1.95345	1.93263	1.93074	1.9555	1.94103	1.957	1.94875	1.94397	1.93768	1.90322	1.94375
[truncated: 182 more columns]

## Sheet: Table S6
Table S6. Chemical composition of members of proustite (pro) - pyrargyrite (pyr) solid solution; base = 7 apfu
	pyr	pyr	pyr	pyr	pyr	pyr	pyr	pyr	pyr	pyr	pyr	pyr	pyr	pyr	pyr	pyr	pyr	pyr	pyr	pyr	pyr	pyr	pyr	pyr	pyr	pyr	pyr	pyr	pyr	pyr	pyr	pyr	pyr	pyr	pyr	pyr	pyr	pyr	pyr	pyr	pyr	pyr	pyr	pyr	pyr	pyr	pyr	pyr	pyr
wt. %	1	2	3	4	5	6	7	8	9	10	11	12	13	14	15	16	17	18	19	20	21	22	23	24	25	26	27	28	29	30	31	32	33	34	35	36	37	38	39	40	41	42	43	44	45	46	47	48	49
Ag	59.27	59.56	59.44	60.23	59.56	59.31	59.12	59.23	60.76	58.57	58.82	57.03	59.66	60.16	61.33	58.452	59.583	59.31	58.21	59.99	58.945	59.064	60.15	59.82	57.197	58.59	58.59	60.608	58.56	57.464	60.39	57.462	58.778	59.644	58.916	59.14	60.601	60.5	59.592	61.299	59.59	59.702	59.24	60.44	58.02	59.278	60.242	57.704	59.39
Fe	0.22	0.11	0.1	0.05	0.17	0	0.08	0	0.06	0	0	0.11	0	0	0.41	0	0	0	0	0	0	0	0	0	0	0.25	0.3	0	0.38	0.162	0	0.22	0.046	0	0	0.26	0	0.23	0	0	0.16	0	0.45	0.34	0.26	0	0.049	0.05	0
Pb	0.18	0.18	0.07	0	0.14	0	0.06	0.05	0	0.06	0.07	0.1	0.08	0	0.08	0.115	0	0	0	0	0	0	0	0.09	0.082	0.12	0.06	0.123	0.05	0	0	0.062	0	0.076	0	0	0	0.1	0	0	0.07	0	0.06	0.07	0.06	0	0.074	0.047	0.06
Hg	0.17	0	0	0.07	0	0.29	0	0	0.19	0.13	0.23	0.13	0	0	0.06	0	0	0	0.13	0.22	0	0	0.29	0	0	0.13	0	0	0.09	0.138	0	0.126	0.091	0.083	0	0	0	0	0	0	0.13	0	0.13	0	0	0	0	0	0.2
Cu	0.09	0.07	0.11	0.19	0.04	0.08	0.23	0.19	0.21	0.17	0.18	0.09	0.23	0.16	0.09	0.233	0.22	0.2	0.11	0.23	0.3	0.214	0.11	0.11	0.278	0.04	0.06	0.154	0.05	0.08	0.13	0.301	0.188	0.121	0.252	0.07	0.125	0.16	0.238	0.066	0.04	0.332	0.06	0.05	1.19	0.264	0.075	0.361	0.07
Sb	23.56	23.63	22.74	21.18	23.05	23.53	23.57	23.72	21.28	22.31	22.42	21.48	22.01	21.45	21.21	20.901	20.925	21.25	20.98	21.12	20.469	20.582	21.6	21.28	21.044	21.11	20.81	21.694	20.74	20.161	20.42	19.808	20.532	21.254	19.87	20.58	21.618	20.65	19.985	19.913	21.18	19.611	20.29	21.13	20.5	19.97	20.578	19.566	20.34
As	0	0	0	0	0	0	0	0	0	0.13	0.22	0.51	0.54	0.74	0.87	0.87	0.899	1.04	1.08	1.1	1.105	1.117	1.16	1.22	1.184	1.26	1.29	1.351	1.31	1.34	1.43	1.426	1.449	1.477	1.477	1.5	1.564	1.53	1.512	1.57	1.56	1.559	1.56	1.62	1.6	1.592	1.629	1.583	1.65
Se	0	0	0	0	0	0.23	0.62	0.7	1.37	1.37	1.97	4.97	2.05	0.25	0	2.468	1.846	2.33	0.61	1.49	1.803	2.534	0.35	0.31	5.663	3.36	2.22	0	2.9	6.265	0.63	7.076	3.558	2.08	1.819	3.27	0	0	1.829	0	1.95	1.348	2.97	1.32	1.38	1.714	1.54	5.923	0.28
S	17.2	16.45	16.87	16.37	16.63	16.99	16.54	16.56	15.28	16.4	15.99	14.45	15.92	16.91	17.19	15.992	16.258	15.7	16.9	16.47	16.497	16.178	16.66	17.33	14.559	15.6	15.81	17.892	15.59	14.166	16.63	13.928	15.334	16.243	16.316	15.5	17.997	17.12	16.499	17.589	16.1	16.523	15.46	16.66	16.5	16.582	16.859	14.347	17.22
Cl	0.06	0.07	0.09	0.06	0.07	0.08	0.06	0.07	0.08	0.06	0.08	0.06	0.07	0.07	0.07	0	0	0.04	0.05	0.07	0	0	0.1	0.07	0	0.05	0.06	0	0.06	0	0.06	0	0	0	0	0.07	0	0.06	0	0	0.09	0	0.03	0.08	0.05	0	0	0	0.08
total	100.75	100.07	99.42	98.15	99.66	100.51	100.28	100.52	99.23	99.2	99.98	98.93	100.56	99.74	101.31	99.031	99.731	99.87	98.07	100.69	99.119	99.689	100.42	100.23	100.007	100.51	99.2	101.822	99.73	99.776	99.69	100.409	99.976	100.978	98.65	100.39	101.905	100.35	99.655	100.437	100.87	99.075	100.25	101.71	99.56	99.4	101.046	99.581	99.29
apfu
Ag	2.98584	3.05494	3.0364	3.12987	3.05191	3.00492	3.0152	3.01593	3.18098	3.01155	3.0232	3.0046	3.04964	3.05284	3.05699	3.01191	3.04425	3.05057	2.98625	3.03307	3.00868	3.0144	3.04824	2.99955	2.97071	2.99336	3.01567	2.98162	3.00735	3.00199	3.06882	2.98786	3.02626	3.0172	3.02246	3.02223	2.97142	3.03491	3.02535	3.05435	3.01864	3.04353	3.03366	3.01415	2.93061	3.01041	3.01426	3.00522	2.99948
Fe	0.0214066	0.0108977	0.00986674	0.00501852	0.0168251	0	0.0078807	0	0.00606718	0	0	0.0111936	0	0	0.0394728	0	0	0	0	0	0	0	0	0	0	0.02467	0.0298246	0	0.0376929	0.0163464	0	0.022095	0.00457449	0	0	0.0256633	0	0.0222849	0	0	0.0156549	0	0.0445099	0.0327501	0.0253657	0	0.00473555	0.00502959	0
Pb	0.00472094	0.00480668	0.00186167	0	0.00373481	0	0.00159315	0.00132548	0	0.00160616	0.00187311	0.00274288	0.00212902	0	0.00207604	0.00308506	0	0	0	0	0	0	0	0.0023495	0.0022173	0.00319184	0.00160781	0.0031503	0.00133683	0	0	0.0016784	0	0.00200159	0	0	0	0.00261164	0	0	0.00184612	0	0.00159966	0.00181745	0.00157781	0	0.00192769	0.00127436	0.00157764
Hg	0.00460537	0	0	0.00195611	0	0.00790108	0	0	0.00534909	0.00359452	0.00635701	0.00368307	0	0	0.00160826	0	0	0	0.00358637	0.0059815	0	0	0.00790305	0	0	0.0035716	0	0	0.00248547	0.00387683	0	0.00352317	0.00251951	0.00225787	0	0	0	0	0	0	0.00354131	0	0.00357996	0	0	0	0	0	0.00543183
Cu	0.00769625	0.00609468	0.00953845	0.0167599	0.00347921	0.00688018	0.019912	0.0164224	0.0186624	0.0148378	0.0157043	0.00804878	0.0199571	0.0137823	0.00761497	0.0203799	0.0190803	0.0174618	0.00957911	0.0197395	0.0259929	0.0185394	0.00946259	0.00936283	0.0245096	0.00346897	0.00524223	0.0128602	0.00435871	0.00709428	0.0112138	0.0265675	0.0164306	0.0103903	0.0219448	0.00607223	0.0104039	0.0136243	0.0205102	0.00558231	0.00343955	0.0287297	0.00521564	0.00423268	0.102031	0.0227583	0.00637012	0.031914	0.00600117
Sb	1.05155	1.07383	1.02919	0.97513	1.04643	1.05621	1.06504	1.07008	0.987048	1.01634	1.02094	1.00263	0.996803	0.964379	0.936668	0.954186	0.947213	0.968358	0.95358	0.946067	0.925654	0.930657	0.969819	0.945378	0.968364	0.955537	0.948979	0.945553	0.943661	0.933146	0.919359	0.912522	0.936584	0.95258	0.903127	0.931783	0.939124	0.91777	0.898909	0.879074	0.950577	0.885751	0.920571	0.933607	0.917399	0.898533	0.912239	0.902809	0.910139
As	0	0	0	0	0	0	0	0	0	0.00962374	0.0162798	0.0386847	0.0397416	0.0540647	0.0624347	0.0645427	0.0661308	0.0770145	0.0797696	0.0800723	0.0812038	0.0820762	0.0846363	0.0880756	0.0885368	0.0926812	0.0955952	0.0956894	0.0968591	0.100787	0.104623	0.106754	0.10741	0.107573	0.109092	0.110363	0.110409	0.110501	0.110516	0.112629	0.113775	0.114425	0.115017	0.116316	0.116355	0.116402	0.117351	0.118696	0.119978
Se	0	0	0	0	0	0.0159191	0.0431975	0.0486926	0.0979826	0.0962323	0.138323	0.357705	0.143154	0.0173309	0	0.173729	0.128847	0.163717	0.0427507	0.102914	0.125722	0.176673	0.0242307	0.0212352	0.401808	0.234509	0.156099	0	0.203454	0.447116	0.0437353	0.502635	0.250255	0.143743	0.127481	0.228286	0	0	0.126849	0	0.134945	0.093878	0.207775	0.0899291	0.0952237	0.118913	0.105266	0.421403	0.0193186
S	2.91498	2.8385	2.89915	2.86178	2.86671	2.89583	2.83787	2.83671	2.69117	2.83683	2.76481	2.5611	2.73769	2.88679	2.88252	2.77217	2.79448	2.71662	2.91668	2.80138	2.83275	2.77765	2.84029	2.92337	2.54386	2.68124	2.73758	2.96112	2.69342	2.48964	2.84298	2.43637	2.65596	2.76426	2.81589	2.66472	2.96865	2.88914	2.81787	2.94837	2.74371	2.83369	2.6634	2.79506	2.80375	2.83298	2.83785	2.51366	2.92578
Cl	0.00919651	0.0109241	0.0139882	0.00948645	0.0109133	0.012332	0.00931049	0.0108447	0.012743	0.00938654	0.0125104	0.00961776	0.0108869	0.0108077	0.010616	0	0	0.00625969	0.00780436	0.0107682	0	0	0.0154189	0.0106794	0	0.00777222	0.00939619	0	0.00937507	0	0.00927677	0	0	0	0	0.0108839	0	0.00915759	0	0	0.0138714	0	0.00467426	0.0121386	0.00768405	0	0	0	0.0122931
[truncated: 322 more columns]

## Sheet: Table S7
Table S7. Chemical composition of tetrahedrite; base = 29 apfu
wt. %	1	2	3	4	5	6	7	8	9	10	11	12	13	14	15	16	17	18	19	20	21	22	23	24	25	26	27	28	29	30	31	32	33	34	35	36	37	38	39	40	41	42	43	44	45	46	47	48	49
Ag	6.89	9.69	10.39	10.59	10.95	14.08	14.05	14.54	14.62	15.2	14.41	15.05	14.71	15.3	15.12	15.32	15.49	14.69	15.35	14.86	15.72	14.94	15.61	15.93	15.55	16.03	16.17	15.93	16.2	16.76	16.19	16.17	16.8	16.51	16.3	17.34	17.45	17.37	17.35	17.34	17.84	17.55	17.57	17.92	17.95	17.96	17.73	18.02	18.75
Fe	0.51	0.46	0.31	0.45	0.4	6.67	5.04	6.51	6.18	7.54	3.66	6.54	6.44	6.61	6.44	6.34	6.24	4.55	2.04	4.32	6.33	2.32	2.92	6.16	5.8	3.44	2.29	2.88	2.32	5.84	5.49	5.45	5.82	5.12	5.2	5.9	5.98	4.93	3.15	3.15	5.79	5.9	5.91	2.96	2.86	5.96	5.87	5.97	5.68
Pb	0	0	0.08	0.06	0	0	0.07	0.05	0	0.05	0	0.07	0	0.05	0.04	0.09	0	0	0.07	0	0	0	0.05	0.07	0.04	0.06	0	0.14	0.07	0.08	0	0	0.06	0.1	0	0	0.08	0	0	0.06	0	0.08	0	0.05	0.06	0	0.06	0	0.04
Zn	7.19	6.88	6.96	6.98	6.9	0	2.23	0	0	0.03	3.09	0	0	0	0	0	0	1.23	5.86	1.53	0	4.31	4.39	0	0.08	4.49	5.97	4.17	5.58	0.08	0.09	0	0	0.66	0.09	0.15	0	2.21	4.96	4.7	0	0.1	0.06	4.52	4.64	0.05	0.06	0	0.47
Hg	0.07	0.08	0.27	0.21	0.07	0.26	0.15	0.38	1.37	0.25	0.39	0.27	0.36	0.37	0.48	0.56	0.61	1.82	0.17	1.41	0.51	0.15	0.29	1.45	1.05	0.36	0.13	0.18	0.26	0.61	1.97	1.63	2.01	1.01	1.87	1.17	1.42	1.7	0.22	0.22	1.61	0.8	0.82	0.05	0.06	0.84	0.96	0.76	0.54
Cu	33.82	30.51	29.85	30.03	30.04	30.52	29.24	29.78	29.62	30.18	28.31	29.5	28.65	29.51	29.12	28.74	28.75	26.03	27.64	25.98	28.28	25.96	27.74	28.31	26.84	27.44	26.99	25.89	27.02	26.44	25.37	25.51	26.55	25.59	24.74	26.64	26.55	25.91	25.61	25.86	26.36	25.17	25.13	25.62	25.67	25.16	24.45	25.23	25.81
Sb	19.17	26.24	26.64	26.04	26.38	15.46	17.96	16.74	16.39	15.62	23.81	17.02	16.43	17.47	17.21	17.07	17.96	26.9	24.44	27.4	17.33	26.98	22.23	17.61	22.98	23.25	24.46	27.4	24.92	20.94	23.35	23.58	19.97	24.14	23	21.96	20.85	23.69	26.48	26.71	22.01	25	25.12	26.62	26.03	26.04	25.44	25.45	15.48
As	6.81	1.85	1.5	2.12	1.56	9.02	7.63	7.8	8.43	8.46	3.24	8.16	7.88	8.02	7.56	7.61	7.25	1	2.42	0.78	7.12	1.18	3.37	7.36	3.38	3.38	2.45	1.12	2.02	4.95	2.66	2.81	5.55	2.48	3.59	4.48	5.19	2.56	1.07	0.99	4.51	2.14	2.12	1	1.14	1.62	1.93	2.03	8.21
Se	0	0	0	0	0	0	0	0.07	0.28	0	0	0.08	0.13	0.08	0.1	0.13	0.07	0	0	0	0.12	0	0	0.51	0.39	0	0	0	0	0	1.52	1.36	0.41	0.82	0.4	0.03	0.31	1.64	0.08	0	0.19	0	0	0.07	0	0.07	0	0.06	0.23
S	25.13	23.52	23.31	23.9	23.31	24.88	23.92	24.43	24.14	24.9	23.62	24.52	24.04	24.68	24.29	23.88	24.08	23.06	23.81	23.01	24	22.88	23.9	23.79	23.19	23.52	23.35	23.39	23.4	23.81	22.36	22.26	22.94	22.66	22.48	23.08	23.14	22.47	22.91	22.75	23.55	22.98	22.91	23.25	23.27	23.19	22.82	23.09	24.1
total	99.59	99.23	99.31	100.38	99.61	100.89	100.29	100.3	101.03	102.23	100.53	101.21	98.64	102.09	100.36	99.74	100.45	99.28	101.8	99.29	99.41	98.72	100.5	101.19	99.3	101.97	101.81	101.1	101.79	99.51	99	98.77	100.11	99.09	97.67	100.75	100.97	102.48	101.83	101.78	101.86	99.72	99.64	102.06	101.68	100.89	99.32	100.61	99.31
apfu
Ag	1.05991	1.57164	1.69742	1.70028	1.78224	2.15707	2.2074	2.26409	2.28162	2.30798	2.32078	2.32941	2.332	2.35327	2.36693	2.42388	2.43967	2.45508	2.45608	2.4853	2.49478	2.50071	2.505	2.51579	2.55057	2.56159	2.604	2.60901	2.61525	2.71224	2.71577	2.71754	2.74265	2.75433	2.7609	2.81833	2.8257	2.83086	2.83636	2.84342	2.87241	2.91083	2.91888	2.91997	2.92846	2.95549	2.96684	2.9689	2.99513
Fe	0.151535	0.144105	0.0978202	0.13955	0.125749	1.9737	1.52942	1.95795	1.86285	2.21132	1.13853	1.95515	1.97195	1.9637	1.94721	1.93747	1.89826	1.46875	0.63046	1.39552	1.94033	0.750057	0.905067	1.87902	1.8375	1.06176	0.712295	0.911058	0.7234	1.82541	1.77873	1.76911	1.83517	1.6498	1.70122	1.8522	1.87036	1.55188	0.994639	0.99769	1.80062	1.8901	1.89638	0.931589	0.901226	1.89436	1.89721	1.8998	1.75249
Pb	0	0	0.00680437	0.00501534	0	0	0.00572567	0.00405343	0	0.00395259	0	0.00564068	0	0.00400382	0.00326001	0.00741343	0	0	0.00583118	0	0	0	0.00417733	0.00575547	0.00341578	0.00499173	0	0.0119375	0.00588328	0.00674012	0	0	0.00509959	0.00868545	0	0	0.00674441	0	0	0.00512233	0	0.00690803	0	0.00424164	0.00509624	0	0.0052271	0	0.00332658
Zn	1.82513	1.84133	1.87628	1.84925	1.85317	0	0.578128	0	0	0.00751663	0.821188	0	0	0	0	0	0	0.339206	1.5472	0.422247	0	1.19043	1.16248	0	0.0216526	1.18396	1.58643	1.12697	1.48644	0.0213628	0.0249116	0	0	0.181688	0.0251548	0.0402298	0	0.594327	1.33801	1.27176	0	0.0273687	0.0164479	1.21533	1.24913	0.0135771	0.0165673	0	0.123887
Hg	0.00579071	0.00697753	0.0237203	0.0181313	0.0061268	0.02142	0.012673	0.0318197	0.114974	0.0204132	0.0337767	0.0224728	0.0306904	0.0306031	0.0404072	0.0476457	0.0516645	0.163568	0.0146274	0.126813	0.0435244	0.0135017	0.0250257	0.123143	0.0926144	0.0309358	0.0112579	0.0158532	0.0225712	0.0530844	0.177703	0.147312	0.176457	0.0906094	0.170329	0.102261	0.123652	0.148988	0.0193405	0.0193998	0.139399	0.0713532	0.0732558	0.0043812	0.00526393	0.0743337	0.0863853	0.0673345	0.0463864
Cu	8.83138	8.39992	8.27795	8.18437	8.29958	7.9369	7.79806	7.87151	7.84668	7.77878	7.73952	7.75061	7.70984	7.70467	7.73803	7.7187	7.68637	7.38452	7.50718	7.37572	7.61839	7.37603	7.55642	7.58932	7.47296	7.44329	7.378	7.19776	7.40436	7.26307	7.22388	7.27748	7.35748	7.24675	7.11324	7.34989	7.29792	7.16788	7.10684	7.19822	7.20446	7.08644	7.08666	7.08636	7.10895	7.0281	6.94494	7.05606	6.99852
Sb	2.61274	3.77065	3.85595	3.70416	3.80409	2.09843	2.49997	2.30945	2.2662	2.10132	3.39745	2.33396	2.30769	2.38066	2.38693	2.39282	2.50616	3.98309	3.46465	4.06008	2.4367	4.0011	3.16059	2.46401	3.33949	3.29172	3.48989	3.9759	3.56426	3.0023	3.47021	3.51102	2.88843	3.56804	3.45156	3.16227	2.9913	3.42064	3.83534	3.88052	3.13975	3.6737	3.69733	3.84301	3.76247	3.79654	3.77161	3.71494	2.19083
As	1.50828	0.432002	0.352818	0.490058	0.365563	1.98955	1.7259	1.74867	1.89413	1.84945	0.751277	1.81838	1.79857	1.77599	1.70389	1.7335	1.644	0.240619	0.557488	0.18782	1.62684	0.284368	0.778611	1.67349	0.798194	0.77764	0.568046	0.264098	0.469499	1.15331	0.642411	0.67992	1.30448	0.59567	0.875474	1.04835	1.20999	0.600682	0.251844	0.233729	1.04548	0.511022	0.507068	0.234599	0.267772	0.383817	0.464974	0.481529	1.88818
Se	0	0	0	0	0	0	0	0.0148906	0.0596953	0	0	0.0169155	0.0281543	0.0168096	0.0213855	0.0280984	0.0150613	0	0	0	0.0260163	0	0	0.110031	0.0873889	0	0	0	0	0	0.348317	0.312241	0.0914386	0.186882	0.0925569	0.00666115	0.0685769	0.365131	0.0178664	0	0.0417918	0	0	0.015582	0	0.0157364	0	0.0135045	0.0501911
S	13.0052	12.8334	12.8112	12.9092	12.7635	12.8229	12.6427	12.7976	12.6738	12.7193	12.7975	12.7675	12.8211	12.7703	12.792	12.7105	12.7588	12.9652	12.8165	12.9465	12.8134	12.8838	12.9026	12.6394	12.7962	12.6441	12.6501	12.8874	12.7083	12.9625	12.6181	12.5854	12.5988	12.7175	12.8096	12.6198	12.6058	12.3196	12.5998	12.5501	12.7561	12.8223	12.804	12.7449	12.7716	12.838	12.8462	12.7979	12.9511

## Sheet: Table S8
Table S8. Chemical composition of freibergite; base = 29 apfu
wt. %	1	2	3	4	5	6	7	8	9	10	11	12	13	14	15	16	17	18	19	20	21	22	23	24	25	26	27	28	29	30	31	32	33	34	35	36	37	38	39	40	41	42	43	44	45	46	47	48	49
Ag	18.46	18.31	19.19	19.249	18.87	19.45	18.52	19.418	19.728	19.37	19.16	19.722	19.96	19.79	18.99	19.99	19.92	19.831	19.842	19.738	19.293	19.74	20.33	20.4	20.116	20.4	20.45	20.232	19.84	19.39	19.53	20.454	19.86	20.41	19.763	19.25	20.78	20.82	19.74	20.35	20.12	20.74	21.02	20.23	20.654	20.17	20.12	20.3	20.26
Fe	5.82	1.05	5.59	5.732	3.68	2.3	0.92	5.824	5.774	3.47	3.15	5.445	4.09	3.69	1.994	6.29	3.78	5.232	5.445	5.293	1.666	4.86	3.56	6.47	5.435	2.89	3.86	5.103	4.58	1.01	0.24	5.323	4.02	3.59	1.614	4.71	3.78	4.7	4.84	5.37	0.91	4.72	3.01	0.86	5.826	0.72	0.68	0.77	0.96
Pb	0	0.05	0.09	0	0.06	0	0.05	0	0	0	0	0	0.11	0.09	0.108	0.11	0	0	0	0	0	0.18	0.05	0	0	0.06	0.07	0	0.21	0.05	0	0	0	0.15	0	0	0.06	0	0.06	0	0	0.59	0	0	0	0	0.05	0	0.05
Zn	0.09	5.81	0.37	0.175	2.78	4.69	5.9	0.175	0.16	3.59	3.74	0.424	2.77	3.27	5.966	0.18	3.17	0.777	0.586	0.898	5.908	1.28	3.34	0.2	0.489	3.72	2.9	0.462	1.6	5.68	6.73	0.633	2.07	3	5.932	0.55	2.93	1.37	0.93	0.351	5.98	1.25	3.95	5.92	0	6.12	6.2	6.18	5.89
Hg	0.92	0.26	0.58	1.107	0.65	0.11	0.17	0.602	0.784	0.57	0.04	1.123	0.32	0.44	0	0.29	0.2	0.901	0.995	0.796	0	0.53	0.49	0.4	1.094	0.22	0.37	2.238	0.61	0.22	0.02	1.276	0.4	0.27	0	2.41	0.22	0.98	0.99	1.804	0.14	0.83	0.15	0.14	1.584	0.23	0	0	0.07
Cu	25.36	23.68	25.1	24.856	24.07	25.45	24.02	25.171	25.138	23.98	24.93	25.424	25.65	25.03	23.238	25.25	25.29	24.951	24.467	24.404	23.401	23.89	25.11	25.13	24.383	24.03	24.92	24.22	23.57	23.18	23.43	24.252	23.29	24.78	23.281	23.01	24.3	24.44	22.9	23.472	23.12	24.04	24.02	23.09	23.12	22.87	23.13	23.39	23.26
Sb	26.18	27.31	17.74	17.275	21.84	16.15	27.39	15.583	14.934	21.61	18.35	16.726	16.53	18.73	25.188	19.15	17.05	17.639	17.388	17.919	25.618	20.45	17.57	19.1	16.862	17.49	17.16	18.896	21.97	25.67	25.51	19.637	22.54	18.21	25.617	23.59	18.41	19.6	22.64	19.644	26.91	17.62	19.84	26.89	18.268	27.01	25.78	26.97	26.99
As	1.94	0.46	6.84	6.76	4.06	7.8	0.42	8.145	8.747	3.87	5.01	7.417	7.21	5.79	0.947	5.83	6.58	6.308	6.51	6.089	0.965	4.52	6.65	5.27	7.09	8.37	6.45	5.71	3.89	1.39	1.59	4.839	3.18	6.2	0.944	2.01	6.3	5.15	3.47	4.611	0.37	5.98	5.19	0.5	5.925	0.5	0.98	0.29	0.43
Se	0.16	0	0.23	0	0.09	0	0	0	0	0.89	0	0	0.19	0.11	0	0	0.15	0	0.161	0	0	0	0.13	0	0.429	0	0.19	0	0.07	0	0	0	0	0.19	0	0	0.24	0.82	0	0.569	0	1.24	0	0	0.643	0	0	0	0
S	23.13	22.99	23.7	23.827	23.08	23.66	22.34	23.723	24.337	23.33	23.24	23.866	23.93	23.76	22.733	23.8	23.73	23.908	23.901	23.674	22.904	23.39	23.61	23.86	23.378	23.46	23.73	23.74	22.98	22.3	22.41	24.204	23.39	23.47	22.714	21.94	23.6	23.49	21.88	22.864	22.29	22.68	23.28	22.37	22.849	22.18	22.02	22.13	22
total	102.06	99.92	99.43	98.981	99.18	99.61	99.73	98.641	99.602	100.68	97.62	100.147	100.76	100.7	99.164	100.89	99.87	99.547	99.295	98.811	99.755	98.84	100.84	100.83	99.276	100.64	100.1	100.601	99.32	98.89	99.46	100.618	98.75	100.27	99.865	97.47	100.62	101.37	97.45	99.035	99.84	99.69	100.46	100	98.869	99.8	98.96	100.03	99.91
apfu
Ag	3.0175	3.07843	3.106	3.12567	3.1312	3.13316	3.14173	3.13984	3.14459	3.16597	3.16768	3.16889	3.18062	3.18667	3.1954	3.20392	3.20748	3.20932	3.21826	3.22331	3.23182	3.26218	3.26855	3.27072	3.2814	3.29528	3.29824	3.29633	3.30206	3.30829	3.30896	3.30595	3.30952	3.30928	3.31947	3.33855	3.35876	3.37127	3.39294	3.39454	3.42362	3.42335	3.43284	3.43625	3.43314	3.44337	3.44678	3.4538	3.45768
Fe	1.83752	0.340975	1.74755	1.79777	1.17945	0.715622	0.301446	1.81894	1.77767	1.09547	1.00589	1.68984	1.25883	1.14765	0.648064	1.94721	1.1756	1.63542	1.70579	1.66953	0.539033	1.55128	1.1055	2.0036	1.71242	0.90168	1.20246	1.60587	1.47232	0.332843	0.0785404	1.66175	1.29391	1.12429	0.523614	1.57776	1.1801	1.46995	1.60682	1.73015	0.299083	1.50479	0.949466	0.28215	1.87047	0.237412	0.225002	0.253037	0.316453
Pb	0	0.00437657	0.0075839	0	0.00518339	0	0.00441593	0	0	0	0	0	0.00912573	0.00754496	0.00946122	0.0091788	0	0	0	0	0	0.0154866	0.00418515	0	0	0.00504588	0.00587775	0	0.0181964	0.00444139	0	0	0	0.0126621	0	0	0.00504904	0	0.00536913	0	0	0.0507012	0	0	0	0	0.00445942	0	0.00444262
Zn	0.0242757	1.61187	0.0988194	0.0468908	0.761198	1.24667	1.65156	0.0466934	0.0420838	0.968246	1.02031	0.112418	0.728358	0.868865	1.65652	0.0476054	0.842262	0.207493	0.156837	0.241986	1.63306	0.349048	0.88609	0.0529123	0.131626	0.991559	0.771794	0.124207	0.439418	1.59914	1.88156	0.168824	0.569206	0.80265	1.64411	0.1574	0.781476	0.366055	0.26377	0.0966135	1.67909	0.34046	1.06447	1.6593	0	1.72402	1.75263	1.73502	1.65872
Hg	0.0808698	0.023507	0.0504821	0.0966643	0.058001	0.00952883	0.0155082	0.0523459	0.0672018	0.0500997	0.00355623	0.0970329	0.0274211	0.0381001	0	0.0249949	0.0173176	0.0784108	0.0867845	0.069903	0	0.0470999	0.042364	0.0344871	0.0959663	0.0191103	0.0320903	0.196081	0.0545955	0.0201851	0.00182223	0.110905	0.035845	0.0235417	0	0.224764	0.0191223	0.0853339	0.0915056	0.161822	0.0128106	0.0736722	0.0131733	0.0127879	0.141588	0.0211149	0	0	0.00642431
Cu	7.0367	6.75813	6.89611	6.85126	6.77984	6.95914	6.91681	6.90888	6.80168	6.6532	6.99637	6.93432	6.93814	6.84157	6.63747	6.86966	6.91237	6.85426	6.73629	6.76496	6.65406	6.70164	6.85281	6.83927	6.75165	6.589	6.82247	6.69838	6.65898	6.71341	6.73854	6.6538	6.58808	6.82019	6.63776	6.77404	6.66722	6.71766	6.68142	6.64617	6.67806	6.73567	6.65883	6.65759	6.52349	6.62748	6.72613	6.75516	6.73844
Sb	3.79148	4.06804	2.54392	2.48529	3.21081	2.30494	4.11665	2.23243	2.10902	3.12936	2.68786	2.38107	2.33371	2.6721	3.75506	2.71933	2.43233	2.5291	2.49867	2.59261	3.80204	2.99418	2.50272	2.71313	2.43697	2.50308	2.45205	2.72763	3.23964	3.88039	3.82933	2.81201	3.32784	2.61592	3.81213	3.62475	2.6364	2.81185	3.4477	2.90316	4.05691	2.57675	2.87069	4.04672	2.69031	4.08532	3.91284	4.06542	4.08105
As	0.456565	0.111348	1.59393	1.5804	0.969952	1.80902	0.10258	1.89618	2.00736	0.910697	1.19253	1.71581	1.65414	1.34232	0.229422	1.34531	1.52541	1.46976	1.52021	1.43163	0.232734	1.07544	1.5393	1.21649	1.66514	1.94658	1.49773	1.33941	0.932135	0.341449	0.387857	1.12605	0.762953	1.44733	0.228283	0.50189	1.46609	1.20062	0.858705	1.10738	0.0906453	1.42111	1.22032	0.122277	1.41795	0.122895	0.241711	0.071037	0.105657
Se	0.035729	0	0.0508557	0	0.0204017	0	0	0	0	0.198725	0	0	0.0413609	0.0241974	0	0	0.0329952	0	0.0356736	0	0	0	0.0285526	0	0.0956007	0	0.0418628	0	0.0159157	0	0	0	0	0.0420853	0	0	0.0529945	0.181389	0	0.129663	0	0.279608	0	0	0.146011	0	0	0	0
S	12.7194	13.0033	12.9047	13.0161	12.884	12.8219	12.7493	12.9047	13.0504	12.8282	12.9258	12.9006	12.8283	12.871	12.8686	12.8328	12.8542	13.0163	13.0415	13.0061	12.9073	13.0037	12.7699	12.8694	12.8292	12.7487	12.8754	13.0121	12.8667	12.7999	12.7734	13.1607	13.1126	12.802	12.8346	12.8008	12.8328	12.7959	12.6518	12.8305	12.7598	12.5939	12.7902	12.7829	12.777	12.7384	12.6905	12.6665	12.6311
[truncated: 35 more columns]

## Sheet: Table S9
Table S9. Chemical composition of tennantite; base = 29 apfu
wt. %	1	2	3	4	5	6	7	8	9	10	11	12	13	14	15	16	17	18	19	20	21	22	23	24	25	26	27	28
Ag	4.57	5	5.03	8.64	9.07	9.11	13.61	16.7	17.16	17.23	18.109	18.131	17.556	18.22	18.036	18.306	18.872	18.585	18.752	18.256	18.232	19.124	18.901	18.78	18.809	19.549	18.68	19.43
Fe	5.68	5.66	5.88	6.39	6.14	5.91	6.38	6.59	5.88	6.88	5.805	5.192	5.803	7.48	5.823	5.743	5.527	6.001	5.81	5.925	5.975	5.77	6.171	5.853	5.906	5.754	4.6	6.56
Pb	0.17	0.11	0	0.06	0	0.17	0	0.13	0.07	0	0	0	0.136	0.11	0.145	0.169	0	0.164	0	0	0.147	0	0	0	0	0	0	0
Zn	1.2	1.35	1.01	1.65	1.7	1.69	0	0.12	1.54	0.04	1.143	2.052	0.603	0.04	0.628	0.671	1.725	0.416	1.416	0.541	0.493	1.414	0.431	0.521	0.072	1.361	1.85	0.05
Hg	0.29	0.2	0.21	0.1	0	0	0.84	0	0.28	0.18	0.228	0.377	0.552	0.2	0.599	0.498	0	0	0.291	0.44	0.393	0.364	0.273	0.352	1.424	0	0.19	0.15
Cu	37.31	36.98	37.24	34.42	34.58	34.2	30.16	30.1	28.72	29.13	29.162	28.338	27.731	28.13	27.491	27.326	27.59	27.576	27.753	27.176	27.175	27.72	27.404	26.469	26.939	27.284	25.99	27.29
Sb	9.05	10.04	9.37	8.39	6.76	8.43	14.36	4.41	8.63	6.22	1.954	5.807	9.347	7.3	9.018	9.322	6.037	9.491	3.117	11.568	11.621	2.124	10.044	11.8	10.289	3.786	12.04	11.24
As	14.29	13.39	13.79	14.26	15.18	14.07	9.62	16.67	13.23	14.23	16.936	14.523	12.912	14.19	12.28	11.921	14.74	11.803	16.548	11.224	11.113	16.927	11.669	10.395	11.816	16.159	10.24	11.11
Se	0	0	0	0	0	0	0.18	0	0	0	0	0	0	0	0	0	0	0	0	0	0	0	0	0	0	0	0	0
S	26.17	26.22	25.91	25.99	26.03	25.59	24.13	25.96	25.29	25.3	26.645	26.226	24.608	25.59	25.397	25.524	26.06	25.921	25.461	24.482	24.168	25.604	25.486	24.913	24.508	25.406	24.32	24.78
total	98.73	98.95	98.44	99.9	99.46	99.17	99.28	100.68	100.8	99.21	99.982	100.646	99.248	101.26	99.417	99.48	100.551	99.957	99.148	99.612	99.317	99.047	100.379	99.083	99.763	99.299	97.91	100.61
apfu
Ag	0.670257	0.734256	0.74158	1.26792	1.32946	1.35294	2.12683	2.47055	2.59498	2.61279	2.67143	2.70844	2.72469	2.72875	2.7749	2.81577	2.82884	2.83127	2.83502	2.85051	2.86413	2.88492	2.89046	2.93918	2.94199	2.96334	2.97545	2.99869
Fe	1.60904	1.60541	1.6744	1.81122	1.73832	1.69528	1.9257	1.88302	1.71746	2.01511	1.65403	1.49804	1.73955	2.16376	1.7304	1.70622	1.60019	1.76577	1.69659	1.78689	1.81296	1.68121	1.82276	1.7693	1.78427	1.68469	1.41523	1.95549
Pb	0.0129807	0.00840996	0	0.00458408	0	0.0131442	0	0.0100125	0.00551111	0	0	0	0.0109889	0.00857692	0.0116144	0.0135337	0	0.0130073	0	0	0.0120226	0	0	0	0	0	0	0
Zn	0.290416	0.327134	0.245712	0.399554	0.41118	0.414154	0	0.0292936	0.384284	0.010009	0.278234	0.505811	0.154427	0.00988528	0.159434	0.17031	0.426671	0.104575	0.353253	0.139389	0.127796	0.35198	0.108761	0.13455	0.0185832	0.340431	0.486252	0.0127334
Hg	0.0228721	0.015794	0.0166492	0.00789152	0	0	0.0705892	0	0.0227698	0.0146783	0.018087	0.0302846	0.0460695	0.0161075	0.0495583	0.0411924	0	0	0.0236584	0.0369447	0.0331997	0.0295284	0.0224506	0.0296249	0.119776	0	0.0162747	0.012449
Cu	9.28869	9.21826	9.31975	8.57418	8.60397	8.62167	8.00039	7.55871	7.37235	7.49831	7.30249	7.18573	7.30568	7.15137	7.17962	7.13485	7.02015	7.13106	7.12234	7.20288	7.24656	7.09827	7.11378	7.03191	7.15255	7.02053	7.02726	7.14935
Sb	1.17597	1.30628	1.22392	1.09084	0.877889	1.10921	1.98817	0.578015	1.15625	0.835666	0.255386	0.768551	1.28525	0.968638	1.22925	1.27039	0.801743	1.28102	0.417512	1.60029	1.61743	0.283879	1.36086	1.6362	1.42584	0.508466	1.69913	1.53691
As	3.01747	2.83102	2.92712	3.01288	3.20351	3.00844	2.16439	3.55057	2.88047	3.10677	3.59704	3.12348	2.88516	3.05973	2.72013	2.63999	3.18107	2.58879	3.60196	2.52319	2.51348	3.67638	2.56922	2.34229	2.66091	3.52661	2.34834	2.46864
Se	0	0	0	0	0	0	0.0384267	0	0	0	0	0	0	0	0	0	0	0	0	0	0	0	0	0	0	0	0	0
S	12.9123	12.9534	12.8509	12.8309	12.8357	12.7852	12.6855	12.9198	12.8659	12.9067	13.2233	13.1797	12.8482	12.8932	13.1451	13.2077	13.1413	13.2845	12.9497	12.8599	12.7724	12.9938	13.1117	13.1169	12.8961	12.9559	13.0321	12.8657

## Sheet: Table S10
Table S10. Chemical composition of argentotennantite; base = 29 apfu
wt. %	1	2	3	4	5	6	7	8	9	10	11	12	13	14	15	16	17	18	19	20	21	22	23	24
Ag	18.95	19.57	19.478	19.323	19.216	20.12	20.7	21.3	21.16	21.34	22.16	22.75	23.22	24.21	24.3	24.46	24.66	25.64	26.91	26.92	27.81	27.71	28.56	28.02
Fe	5.72	6.64	6.039	5.918	5.742	4.95	4.64	5.09	4.29	5.25	6.052	5.04	4.69	4.85	4.91	4.89	4.74	5.2	5.32	5.44	5.25	5.21	5.47	5.06
Pb	0.05	0.07	0	0.214	0.205	0.06	0.09	0.08	0	0	0	0	0	0	0.06	0.11	0.11	0.09	0.07	0.11	0	0	0.09	0.05
Zn	0.68	0.2	0.208	0.244	0.209	1.69	2.61	1.66	2.55	1.04	1.526	1.7	3.02	2.12	2.07	1.62	2.33	1.42	1.36	1.3	1.32	1.32	1.11	1.38
Hg	0.1	0.02	1.004	1.006	1.28	0.83	0.27	0	0.19	0.12	0	0.18	0.19	0.13	0	0	0.08	0.21	0.18	0	0.21	0.09	0.19	0.12
Cu	25.43	26.78	26.219	26.027	25.644	26.47	24.66	25.36	24.29	24.08	24.838	24.99	24.04	23.83	23.57	23.03	22.88	22.68	21.91	22.34	21.1	20.88	20.9	20.2
Sb	13.01	10.15	13.593	12.502	13.776	10.07	10.27	6.62	11.37	13.25	7.207	5.3	6.5	6.47	7.18	10.83	10.53	7.55	5.21	5.78	8.1	8.15	5.44	11.24
As	10.09	11.43	9.522	9.89	9.123	11.61	11.8	14.65	11.05	10.67	13.703	15.4	14	14.18	13.63	13.53	11.16	13.14	15.57	14.21	13.45	13.67	15.5	10.57
S	23.98	24.75	24.634	24.455	24.121	24.59	23.69	23.82	23.61	23.99	24.388	23.95	24.49	24.05	24.08	23.07	23.22	23.71	23.42	23.62	22.47	22.24	22.64	21.95
total	98.01	99.61	100.697	99.579	99.316	100.39	98.73	98.58	98.51	99.74	99.874	99.31	100.15	99.84	99.8	101.54	99.71	99.64	99.95	99.72	99.71	99.27	99.9	98.59
apfu
Ag	3.03463	3.03585	3.05073	3.05253	3.07095	3.13293	3.30188	3.35612	3.40159	3.40139	3.44231	3.56148	3.6111	3.80222	3.82503	3.88862	3.97055	4.08422	4.27433	4.27554	4.52597	4.53586	4.60432	4.68428
Fe	1.76924	1.98953	1.82691	1.80573	1.77241	1.48875	1.42956	1.54906	1.33204	1.61627	1.81582	1.52396	1.40878	1.47122	1.4928	1.50155	1.47411	1.59988	1.63215	1.66881	1.6503	1.64723	1.70328	1.63387
Pb	0.0041686	0.00565343	0	0.0176004	0.0170564	0.00486405	0.00747408	0.00656254	0	0	0	0	0	0	0.00491704	0.0091045	0.00922092	0.00746375	0.00578864	0.00909562	0	0	0.00755394	0.00435179
Zn	0.179688	0.0511958	0.0537572	0.0636047	0.055115	0.434234	0.686983	0.431599	0.676426	0.273533	0.391156	0.43915	0.774995	0.549406	0.537666	0.42498	0.619053	0.373245	0.356458	0.340701	0.354486	0.356543	0.295287	0.380687
Hg	0.00861153	0.00166841	0.0845622	0.0854607	0.110002	0.0694999	0.02316	0	0.0164249	0.0102855	0	0.0151532	0.0158897	0.0109792	0	0	0.00692677	0.0179884	0.0153748	0	0.0183786	0.00792226	0.0164719	0.010788
Cu	6.9127	7.05188	6.97076	6.97933	6.95664	6.9965	6.67711	6.78285	6.62824	6.51512	6.54941	6.6408	6.34624	6.35289	6.29785	6.21495	6.25343	6.13251	5.90747	6.02286	5.82905	5.80174	5.7195	5.73232
Sb	1.84586	1.39502	1.88625	1.7498	1.95054	1.38924	1.45139	0.924145	1.61939	1.87112	0.99188	0.735105	0.895601	0.900266	1.00133	1.52543	1.50214	1.06552	0.733189	0.81333	1.16794	1.18197	0.777016	1.66481
As	2.32634	2.55283	2.1472	2.2494	2.0991	2.6028	2.70993	3.32339	2.55749	2.44856	3.06466	3.47101	3.13467	3.20631	3.08894	3.09687	2.58707	3.01351	3.56065	3.24934	3.15151	3.22164	3.5977	2.5441
S	12.9188	12.9164	12.9798	12.9965	12.9682	12.8812	12.7125	12.6263	12.7684	12.8637	12.7448	12.6133	12.8127	12.7067	12.7515	12.3385	12.5775	12.7057	12.5146	12.6203	12.3024	12.2471	12.2789	12.3448

[truncated: 12 more sheets: Table S11, Table S12, Table S13, Table S14, Table S15, Table S16, Table S17, Table S18, Table S19, Table S20, Table S21, Table S22]
